# Supplementary material
Source: PubMed Central journal article supplement (PMC3265870)
Supplement: supp_M111.298687_Supplementary_Figure_12_final.pdf [file supp_M111.298687_Supplementary_Figure_12_final.pdf]

Supplementary Figure 1. Detection of the expression of Ag85 in MAP K-10 cell culture. Western blotting assay represented the recombinant MAP Ag85A (lane 1), MAP Ag85B (lane 2), MAP Ag85C (lane 3), and the secreted Ag85 from MAP K-10 culture medium (lane 4). Blots were probed by polyclonal MTB Ag85 antibody.

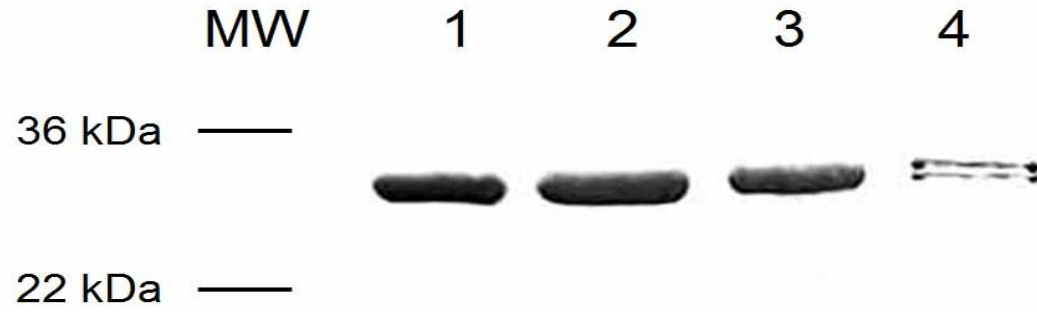

Supplementary Figure 2. The Fn-binding region of Ag85B of *M. tuberculosis* (MTB). (A) The structure of MTB Ag85B was colored to indicate the residues that are important in Fn binding as determined by Naito *et al.*,(1). The published percent inhibition by single-site alanine-substituted Ag85B peptides was used to assign color to the residues. (B) The homologous Fn binding stretch from all Ag85 structures were aligned (PDB entries for Ag85A (1sfr, yellow) (2); for Ag85B (1f0n, 1f0p, red) (3); for Ag85C (1dqy, 1dqz, 1va5, 3hrh, blue) (2,4,5). (C) The sequence alignment for the Fn-binding motif from MTB was derived from the PDB entries for crystal structures.

(A)

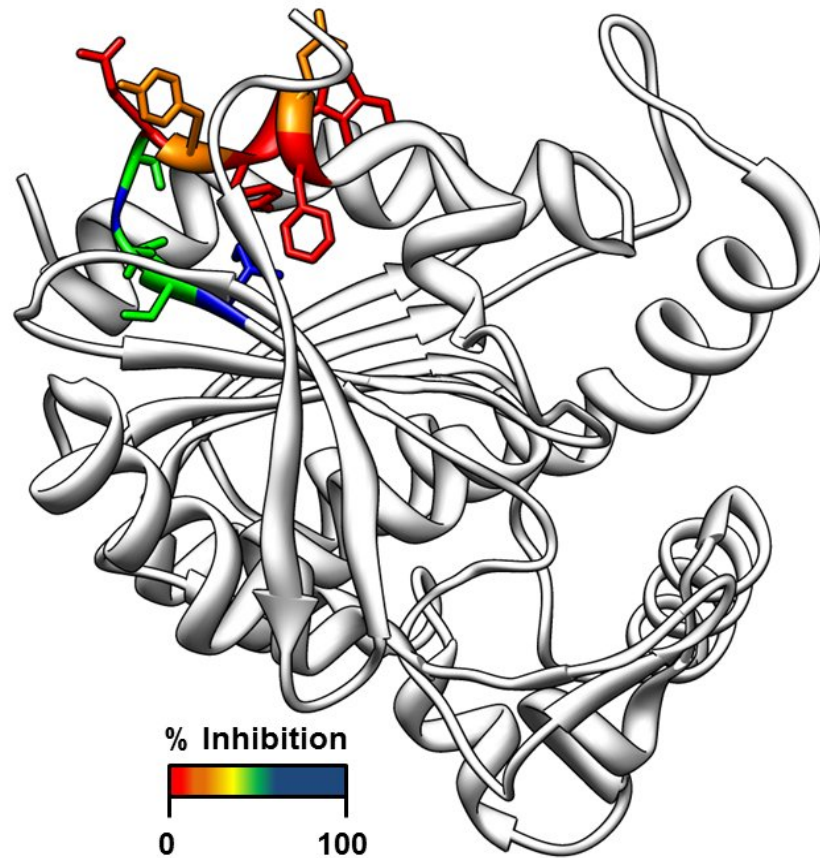

(B)

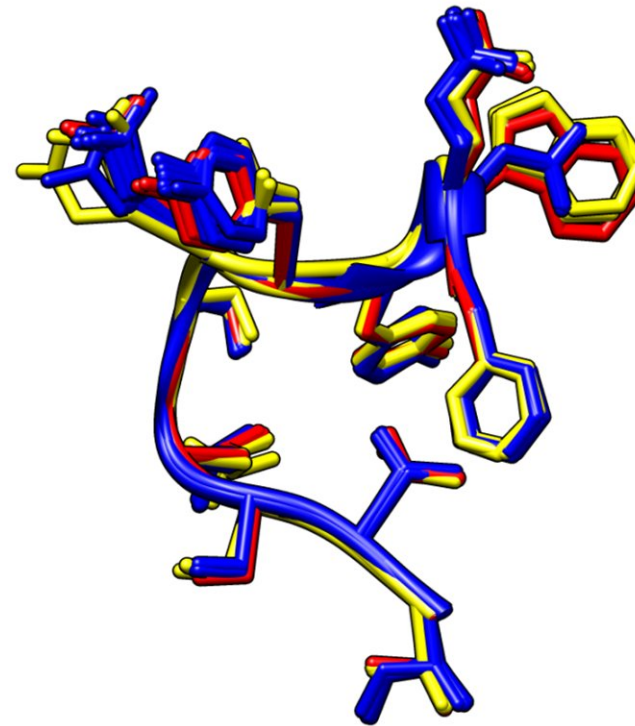

(C)

|           |   |     |   |   |   |   |   |   |   |   |   |
|-----------|---|-----|---|---|---|---|---|---|---|---|---|
| MTB Ag85A | F | EWY | D | Q | S | G | L | S | V |   |   |
| MTB Ag85B | F | EWY | Y | Q | S | G | L | S | I |   |   |
| MTB Ag85C | F | E   | E | Y | Y | Q | S | G | L | S | V |

References:

- (1) Naito, M., Ohara, N., Matsumoto, S., and Yamada, T. (1998) *J. Biol. Chem.* **273**, 2905-2909
- (2) Ronning, D. R., Vissa, V., Besra, G. S., Belisle, J. T., and Sacchettini, J. C. (2004) *J. Biol. Chem.* **279**, 36771-36777
- (3) Anderson, D. H., Harth, G., Horwitz, M. A., and Eisenberg, D. (2001) *J. Mol. Biol.* **307**, 671-681
- (4) Ronning, D. R., Klabunde, T., Besra, G. S., Vissa, V. D., Belisle, J. T., and Sacchettini, J. C. (2000) *Nat. Struct. Biol.* **7**, 141-146
- (5) Sanki, A. K., Boucau, J., Umesiri, F. E., Ronning, D. R., and Sucheck, S. J. (2009) *Mol. Biosyst.* **5**, 945-956
